# Supplementary material
Source: PubMed Central journal article supplement (PMC3583563)
Supplement: NIHMS375617-supplement-Supp_Fig_S1-S5.pdf [file NIHMS375617-supplement-Supp_Fig_S1-S5.pdf]

# Supplemental Fig. 1

Mother  
Father  
Patient  
Control

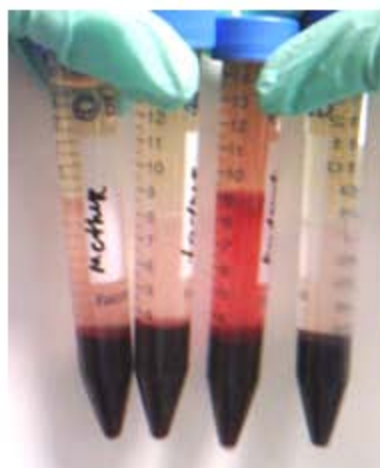

## Supplemental Fig. 2

### c-DNA sequence

A

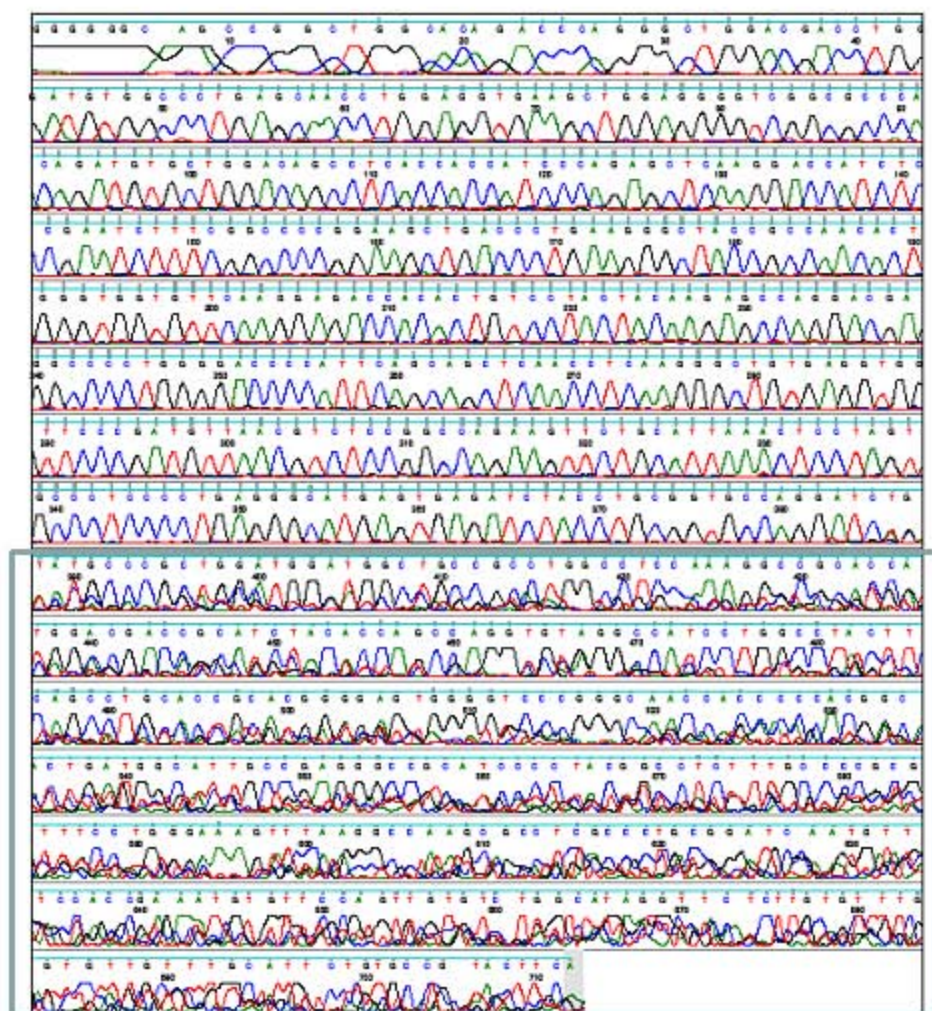

B

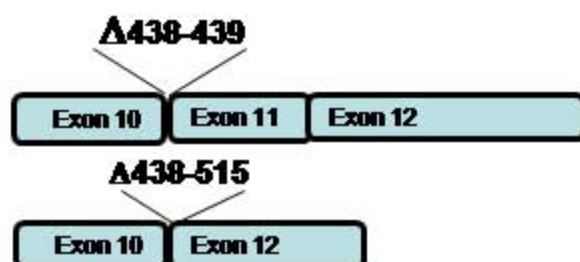

Supplemental Fig. 3

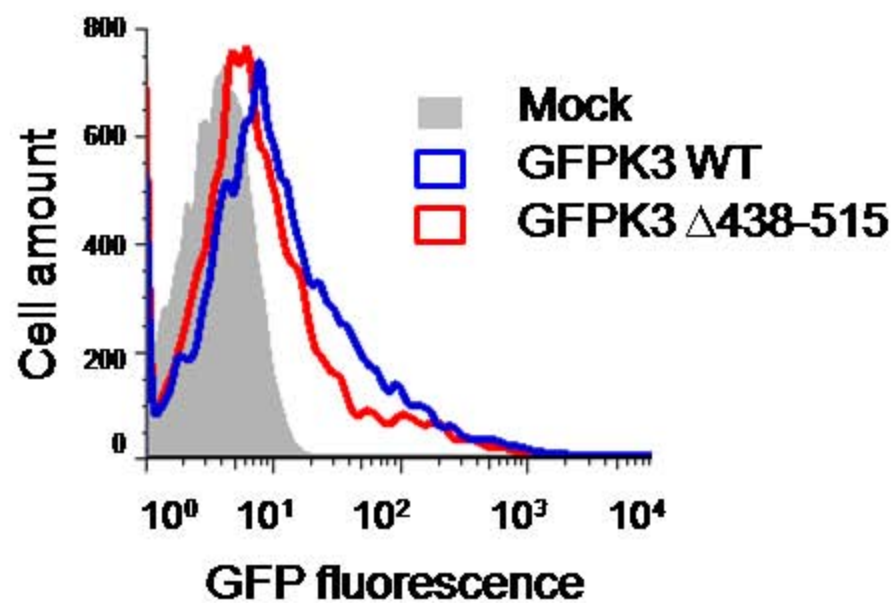

## Supplemental Fig. 4

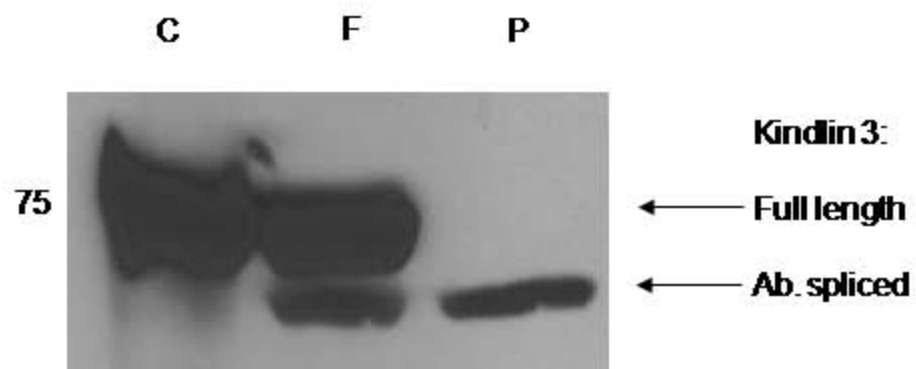

## Supplemental Fig. 5

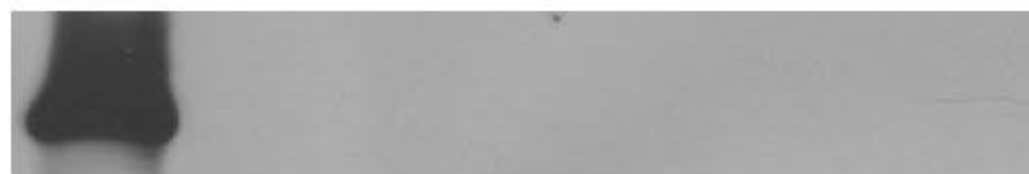

**Kindlin 2**

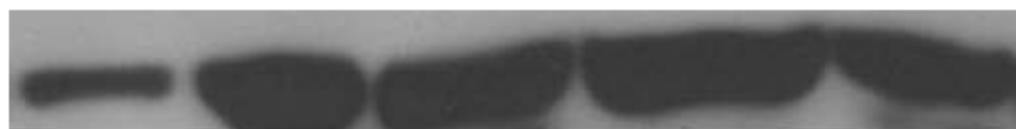

**Actin**

**Huvec**

**C**

**F**

**M**

**P**
